# Supplementary material for: Genomic Biomarkers of Survival in Patients with Adenocarcinoma of the Uterine Cervix Receiving Chemoradiotherapy
Source: PubMed Central journal article supplement (PMC7312424; doi:10.3390/ijms21114117), 2020-06-09
Supplement: ijms-21-04117-s001.pdf [file ijms-21-04117-s001.pdf]

## Supplementary Materials

**Table S1.** Nonsynonymous mutations of the individual tumors.

| Patient                                                                    | Tumor mutation number | mutation 1 | mutation 2 | mutation 3 | mutation 4 | mutation 5 | mutation 6 | mutation 7 | mutation 8 | mutation 9 | mutation 10 |
|----------------------------------------------------------------------------|-----------------------|------------|------------|------------|------------|------------|------------|------------|------------|------------|-------------|
| Cancer DNA sequencing with target cancer panel                             |                       |            |            |            |            |            |            |            |            |            |             |
| 1                                                                          | 4                     | TP53       | POLD1      | SF3B1      | ATRX       |            |            |            |            |            |             |
| 2                                                                          | 71                    | TP53       | FGFR2*     | KMT2A*     | NOTCH2     | PIK3CA*    | ATM        | NF1        | PIK3R1     | ARID1B     | BRAF        |
| 3                                                                          | 6                     | PTEN       | TSC2       | BLM        | PIK3R1*    | SETBP1     | ECORL1     |            |            |            |             |
| 4                                                                          | 27                    | TP53       | FGFR2*     | PIK3R1*    | NOTCH1     | NOTCH2     | ATR        | RET*       | POLI       | ARIDIA     | AR*         |
| 5                                                                          | 5                     | SMAD4      | BRIP1      | SMRCA4     | KMT2C      |            |            |            |            |            |             |
| Whole exome sequencing plus cancer DNA sequencing with target cancer panel |                       |            |            |            |            |            |            |            |            |            |             |
| 6                                                                          | 8                     | GEN1       | GNAS*      | CDKN2C     | SMARCA4    | PPM1D      | GRIN2A     | CIC        | IDH1*      |            |             |
| 7                                                                          | 7                     | AR*        | ARID1A     | KAT6A      | PBRM1      | EP300      | HNF1A      | RAD1       |            |            |             |
| 8                                                                          | 5                     | ATR        | KMT2D      | BCORL1     | PLCG1      |            |            |            |            |            |             |
| 9                                                                          | 12                    | ARID1A     | TP53       | PTEN       | ERBB2*     | CUX1       | KMT2D      | RAD50      | STAG2      | SETD2      | STK11       |
| 10                                                                         | 8                     | FLT4*      | POLE       | RB1        | TSC2       | AXIN1      | EXO1       | KMT2D      | RITI       |            |             |
| 11                                                                         | 2                     | TSC1       | BRCA2      |            |            |            |            |            |            |            |             |
| 12                                                                         | 13                    | ARID1A     | ATM        | PTEN       | PIK3CA*    | ARID1B     | FBXW7      | TET2       | APC        | RAD50      | NRAS*       |
| 13                                                                         | 3                     | PIK3CA*    | KDR        | TCF3       |            |            |            |            |            |            |             |
| 14                                                                         | 3                     | GNAQ*      | LRP1B      | KDM5C      |            |            |            |            |            |            |             |
| 15                                                                         | 3                     | PIK3CA*    | LRP1B      | CUX1       |            |            |            |            |            |            |             |
| 16                                                                         | 5                     | AR*        | ATM        | BRIP1      | MET*       | KMT2D      |            |            |            |            |             |
| 17                                                                         | 2                     | DDR2       | SMC1A      |            |            |            |            |            |            |            |             |
| 18                                                                         | 5                     | TP53       | XRCC2      | KMT2D      | SMAD4      | TGFBR2     |            |            |            |            |             |
| 19                                                                         | 7                     | ATR        | PLCG1      | KMT2C      | PTEN       | PAK3       | ROS1*      | RHOA       |            |            |             |
| 20                                                                         | 6                     | IGF1R*     | NOTCH3     | TCF3       | ARID2      | FBXW7      | SDHB       |            |            |            |             |
| 21                                                                         | 4                     | AR*        | CSF1R*     | NOTCH3     | NOTCH1     |            |            |            |            |            |             |

Note: 1. Somatic mutation numbers in patient 2, 4, 9, and 12 were over 10. Thus, complete information on the mutated genes in these patients cannot be provided in this table.

2. Asterisk represents mutations of oncogenes.

**Table S2.** Predictive immunohistochemical and clinical parameters, tumor mutation number, and AUC.

| Variables                            | Disease-relapse      | Local failure        | Distant metastasis   |
|--------------------------------------|----------------------|----------------------|----------------------|
|                                      | AUC / <i>p</i> value | AUC / <i>p</i> value | AUC / <i>p</i> value |
| <i>Mcl-1</i> H-score                 | 0.66 ± 0.12/0.23     | 0.51 ± 0.13/0.94     | 0.54 ± 0.16/0.80     |
| <i>c-Myc</i> H-score                 | 0.49 ± 0.13/0.40     | 0.61 ± 0.12/0.42     | 0.18 ± 0.11/0.035*   |
| <i>IGF</i> H-score                   | 0.61 ± 0.13/0.42     | 0.63 ± 0.13/0.34     | 0.53 ± 0.16/0.89     |
| <i>PD-L1</i> combined positive score | 0.49 ± 0.13/0.94     | 0.65 ± 0.12/0.24     | 0.19 ± 0.09/0.043*   |
| <i>TNF-α</i> H-score                 | 0.16 ± 0.09/0.007*   | 0.31 ± 0.11/0.16     | 0.28 ± 0.12/0.13     |
| Maximum tumor dimension              | 0.60 ± 0.13/0.46     | 0.57 ± 0.14/0.61     | 0.71 ± 0.13/0.17     |
| Pretreatment hemoglobin              | 0.41 ± 0.13/0.24     | 0.48 ± 0.14/0.39     | 0.38 ± 0.19/0.41     |
| Pretreatment serum CEA               | 0.41 ± 0.13/0.48     | 0.51 ± 0.14/0.91     | 0.59 ± 0.17/0.54     |
| Tumor mutation number                | 0.26 ± 0.11/0.06     | 0.20 ± 0.10/0.023    | 0.49 ± 0.15/0.93     |

Abbreviations: AUC = area under the receiving operating characteristic curve.

CEA = carcinoembryonic antigen.

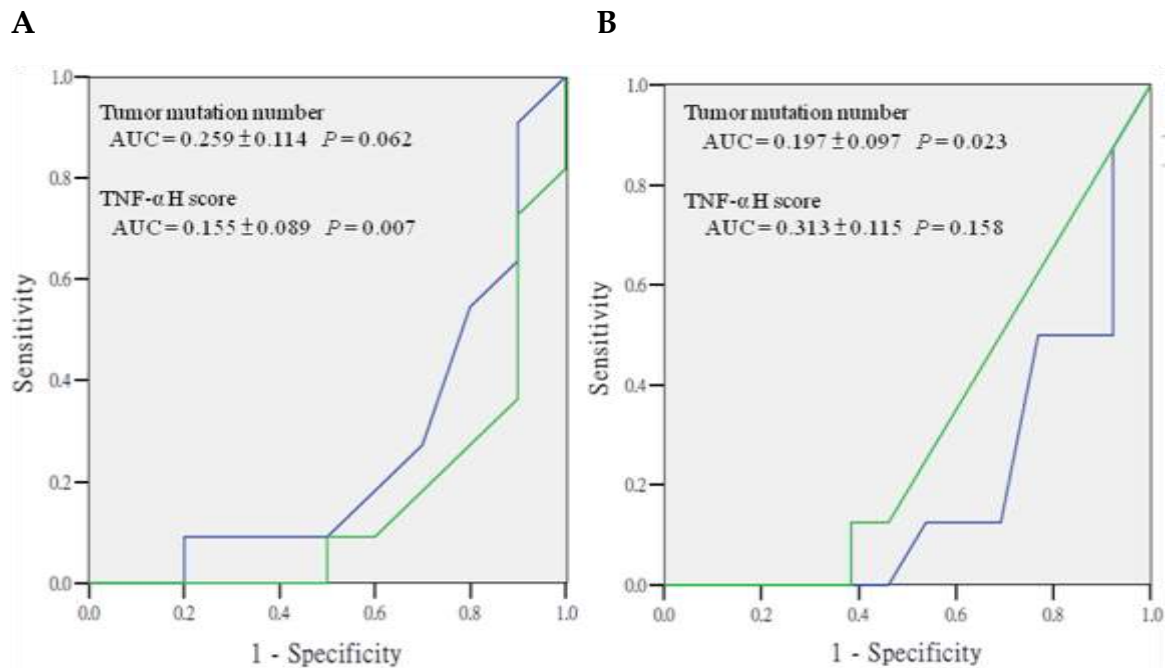

**Figure S1.** Area under the receiver operating characteristic curve (AUC) for the tumor mutation number (TMN) and the *TNF-α* H score for patients with disease relapse (A), and local recurrence (B).

**Table S3.** MCL1 amplification, tumor mutation number, and treatment outcomes.

| <b>Patients</b>                                                   | <b>Local recurrence</b> | <b>Distant metastasis</b> | <b>Cancer death</b> | <b>Disease relapse</b> | <b>MCL1 amplification</b> | <b>Tumor mutation number</b> |
|-------------------------------------------------------------------|-------------------------|---------------------------|---------------------|------------------------|---------------------------|------------------------------|
| DNA sequencing in target cancer panel                             |                         |                           |                     |                        |                           |                              |
| 1                                                                 |                         | +                         | +                   | +                      |                           | 4                            |
| 2                                                                 |                         |                           |                     |                        |                           | 71                           |
| 3                                                                 |                         | +                         |                     | +                      | +                         | 6                            |
| 4                                                                 |                         |                           |                     |                        | +                         | 27                           |
| 5                                                                 |                         |                           |                     |                        |                           | 5                            |
| Whole exome sequencing plus DNA sequencing in target cancer panel |                         |                           |                     |                        |                           |                              |
| 1                                                                 |                         |                           |                     |                        |                           | 8                            |
| 2                                                                 | +                       | +                         | +                   | +                      | +                         | 7                            |
| 3                                                                 | +                       |                           |                     | +                      |                           | 5                            |
| 4                                                                 |                         |                           |                     |                        |                           | 12                           |
| 5                                                                 |                         |                           |                     |                        |                           | 8                            |
| 6                                                                 | +                       | +                         |                     | +                      | +                         | 2                            |
| 7                                                                 |                         | +                         | +                   | +                      | +                         | 13                           |
| 8                                                                 | +                       |                           |                     | +                      |                           | 3                            |
| 9                                                                 | +                       |                           |                     | +                      |                           | 3                            |
| 10                                                                | +                       |                           |                     | +                      | +                         | 3                            |
| 11                                                                | +                       |                           |                     | +                      | +                         | 5                            |
| 12                                                                |                         |                           |                     |                        |                           | 2                            |
| 13                                                                | +                       |                           |                     | +                      |                           | 5                            |
| 14                                                                |                         |                           |                     |                        |                           | 7                            |
| 15                                                                |                         |                           |                     |                        |                           | 6                            |
| 16                                                                |                         |                           |                     |                        |                           | 4                            |

Note: "+" means a positive event.

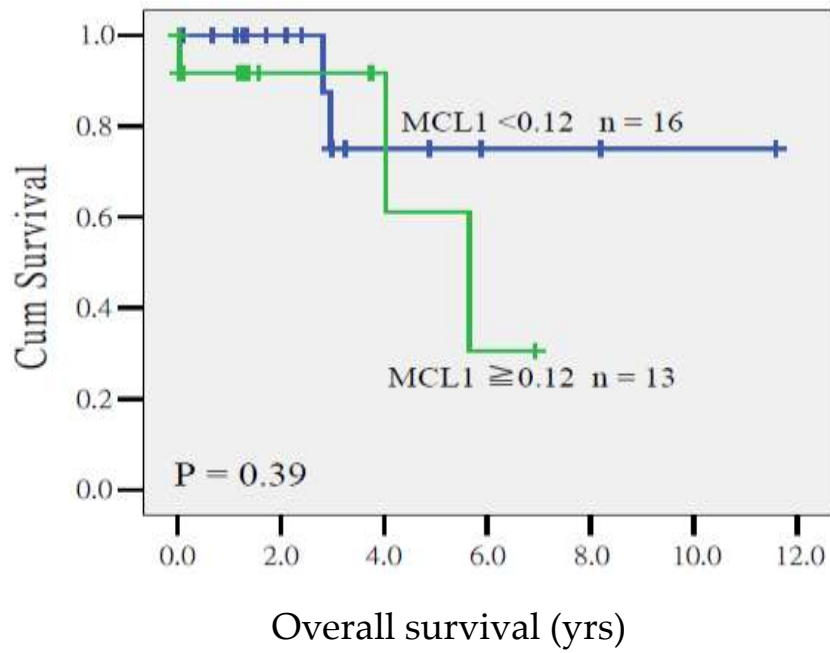

**Figure S2.** External validation in TCGA. Overall survival of the 29 samples in TCGA was stratified by those with or without MCL1 amplification using a median value of the copy number. Although certain patients with MCL1 amplification were likely to have inferior overall survival compared with those without amplification, there was no statistically significant difference between the two groups ( $p = 0.39$ ).

Cum Survival: Cumulative Survival

Note: 1. Median follow-up duration was 2 years.

2. Five patients died, three in the amplification-positive and two in amplification-negative groups.

**A**

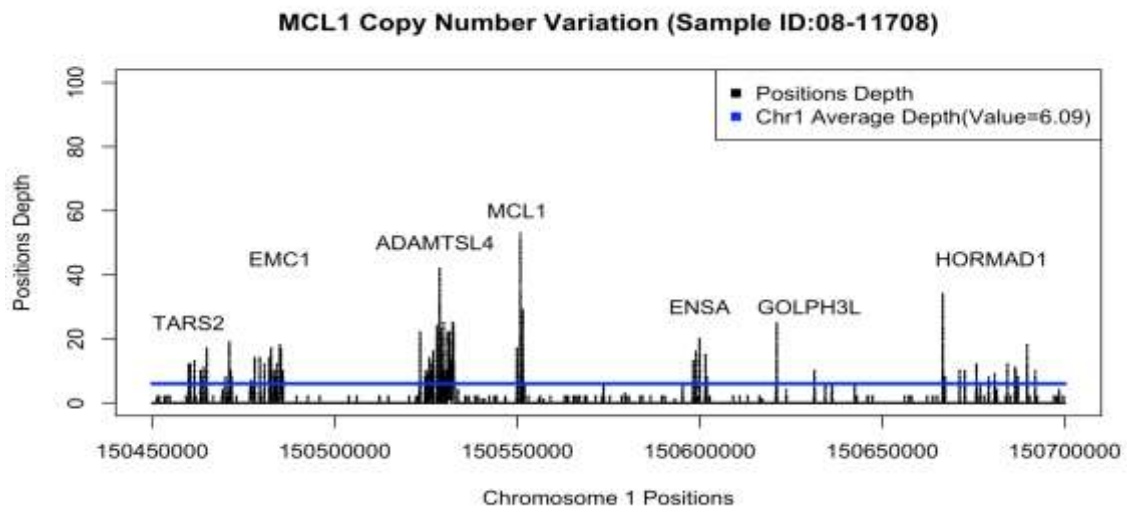

**B.**

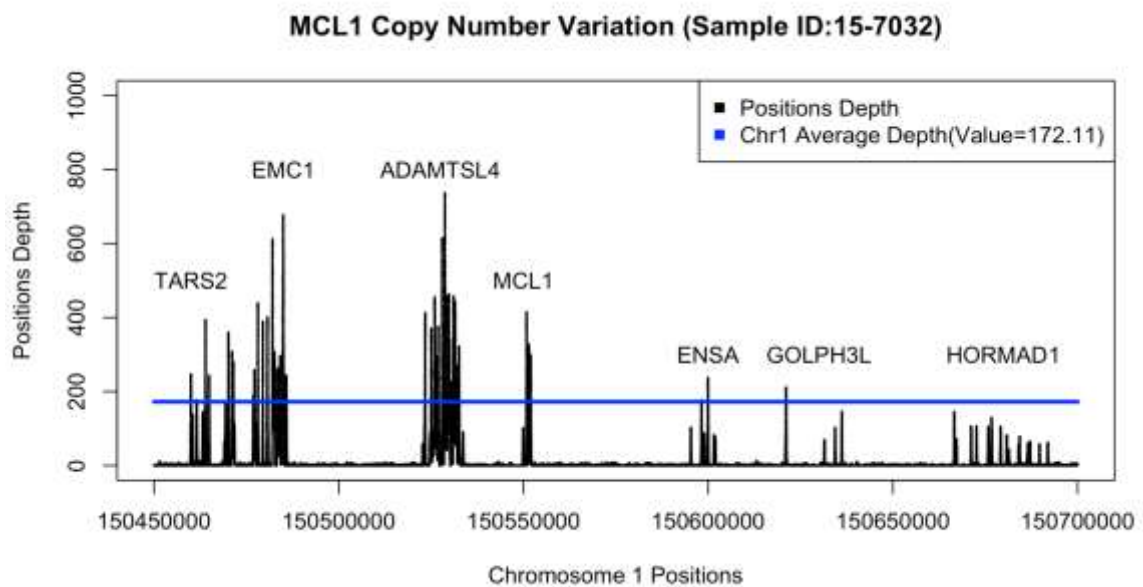

**Figure S3.** Example of tumors with MCL1 amplification (**A**) and without MCL1 amplification (**B**). Note: Samtools was used to obtain the sequencing depth of each point on chromosome 1 from the bam file, and the average depth of chromosome 1 as standard copy was calculated. The sequencing depth of MCL1 was compared with six genes near MCL1 to determine the copy number variation of the MCL1 gene.
